# Supplementary material
Source: PubMed Central journal article supplement (PMC3040298)
Supplement: NIHMS264033-supplement-Supplementary.pdf [file NIHMS264033-supplement-Supplementary.pdf]

## **Materials and Methods**

### **T cell proliferation assay**

CD4<sup>+</sup> *naïve* T cells from OVA-TCR transgenic DO11.10/RAG2<sup>-/-</sup> mice were labeled with 2 μM Carboxyfluorescein diacetate succinimidyl ester (CFSE-Molecular Probes) in PBS for 15 min. sDCs (2 x 10<sup>4</sup>) stimulated or not with PAM (100 ng/ml) were cultured with labeled CD4<sup>+</sup> T cells (1 x 10<sup>5</sup>) in the presence of 0.01, 1.0 or 10 μM OVA in a total volume of 200 μl in 96-well plates for 4 days.

### **Blocking experiments**

DCs (2 x 10<sup>4</sup>) incubated with and without PAM<sub>3</sub>CSK<sub>4</sub> were cultured for 4 days with CD4<sup>+</sup> T cells (1 x 10<sup>5</sup>) in a total volume of 200 μl in 96-well plates. Cultures were performed in the presence of 1 μM OVA (Sigma) as indicated. Where indicated anti-IL-6 (MPS-20F3, eBiosciences), anti-TGF-β (1835, R&D Systems), anti-IL-21 (AF594, R&D Systems), anti-IL-23 (G23-8, EBiosciences) or the appropriate isotypes were used at 10 μg/ml.

### **Cell extracts and immunoblot assay**

sDCs (2 x 10<sup>6</sup>) were treated with C5a (10 nM) for different time periods. C5aRA (10 μM) was included where indicated. The reaction was stopped by the addition of cold PBS/orthovanadate (2 mM) at each time point. Cells were incubated for 5 min on ice in lysis buffer (1% Triton X-100, 5 mM EDTA, 50 mM NaF, 10 mM Tris/Cl [pH7.6], 0.1% BSA, 10 μg/ml aprotinin, 10 μg/ml leupeptin). Lysates were cleared by centrifugation, applied to 12% SDS PAGE and analyzed by Western blotting using anti-phosphorylated ERK (BD Biosciences) and anti-rabbit IgG HRP (Chemicon International). Stripping of the blots (100 mM 2-mercaptoethanol, 2% SDS, 62.5 mM tris-HCl pH 6.7 for 30 min at 50°C) was performed in order to quantify total ERK (anti-ERK- BD Biosciences). Signals were visualized by ECL detection system (GE Healthcare).

## **Reverse transcriptase-polymerase chain reaction (RT-PCR)**

Total RNA was harvested using Trizol<sup>®</sup> Reagent (Invitrogen) according to manufacturer's instructions. Residual genomic DNA was removed by incubation with RNase-free DNase (Sigma). RNA (1 µg) was converted to cDNA using the SuperScript<sup>™</sup> II Reverse Transcriptase (Invitrogen). cDNAs were amplified by PCR (40 cycles: 94°C/1min, 58°C/1min, 72°C/1min) in the presence of 50 mM KCl, 1.5 mM MgCl<sub>2</sub>, 10 mM Tris-HCl, 0.4 mM dNTPs and 0.8 pmol of each specific primer. Amplification of 18s rRNA was used as a control. The primer sequences are as follows. C5aR: sense 5'-GGTCTCTCCCCAGCATCATA-3'; antisense 5'-GGCAACGTAGCCAAGAAAAA-3', C5L2: sense 5'-CTGGGCCTCTTGCTGACTGTGC3'; antisense 5'- GCCCCAGGAAGCCAAAGAGGA-3' and 18s rRNA: from SuperArray Bioscience Corporation-reference n° K01364. Amplification products were analyzed in a 3.0% agarose gel followed by ethidium bromide staining.

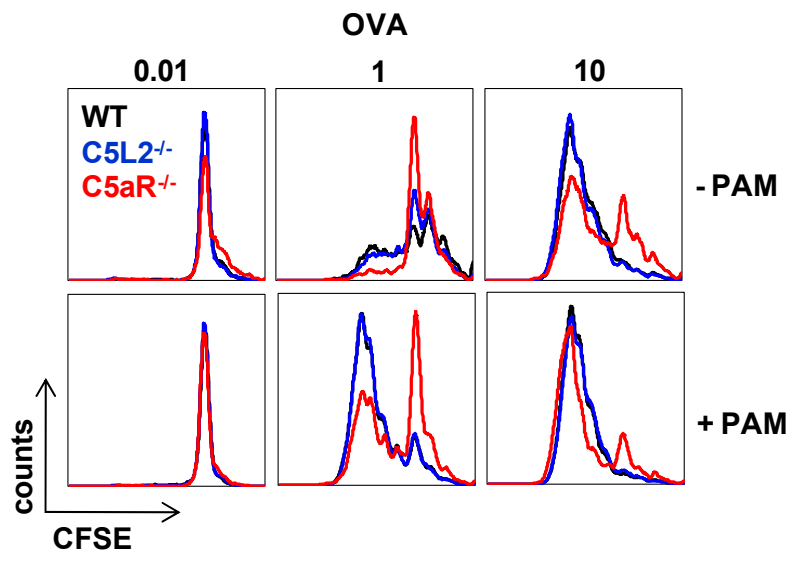

Supporting Information Fig. 1. Weaver et al.

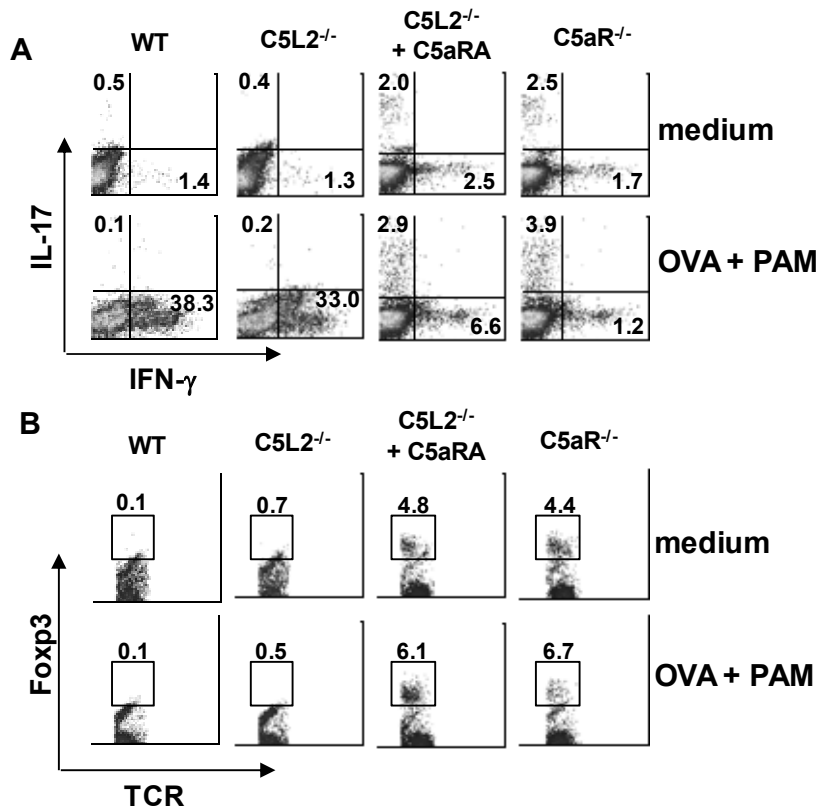

**C** ■ WT □ C5L2<sup>-/-</sup> ■ C5aR<sup>-/-</sup> ■ C5L2<sup>-/-</sup> + C5aRA

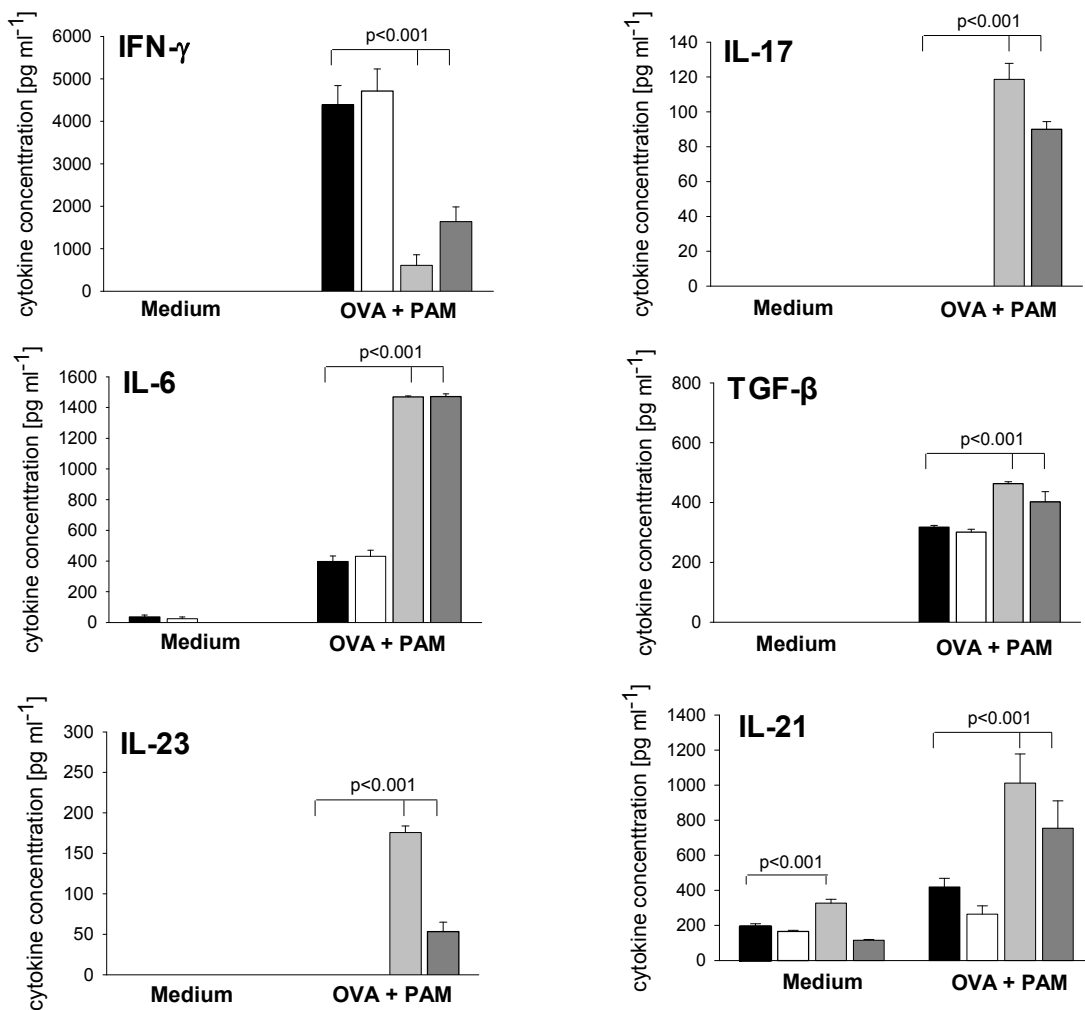

Supporting Information Fig.2 Weaver et al.

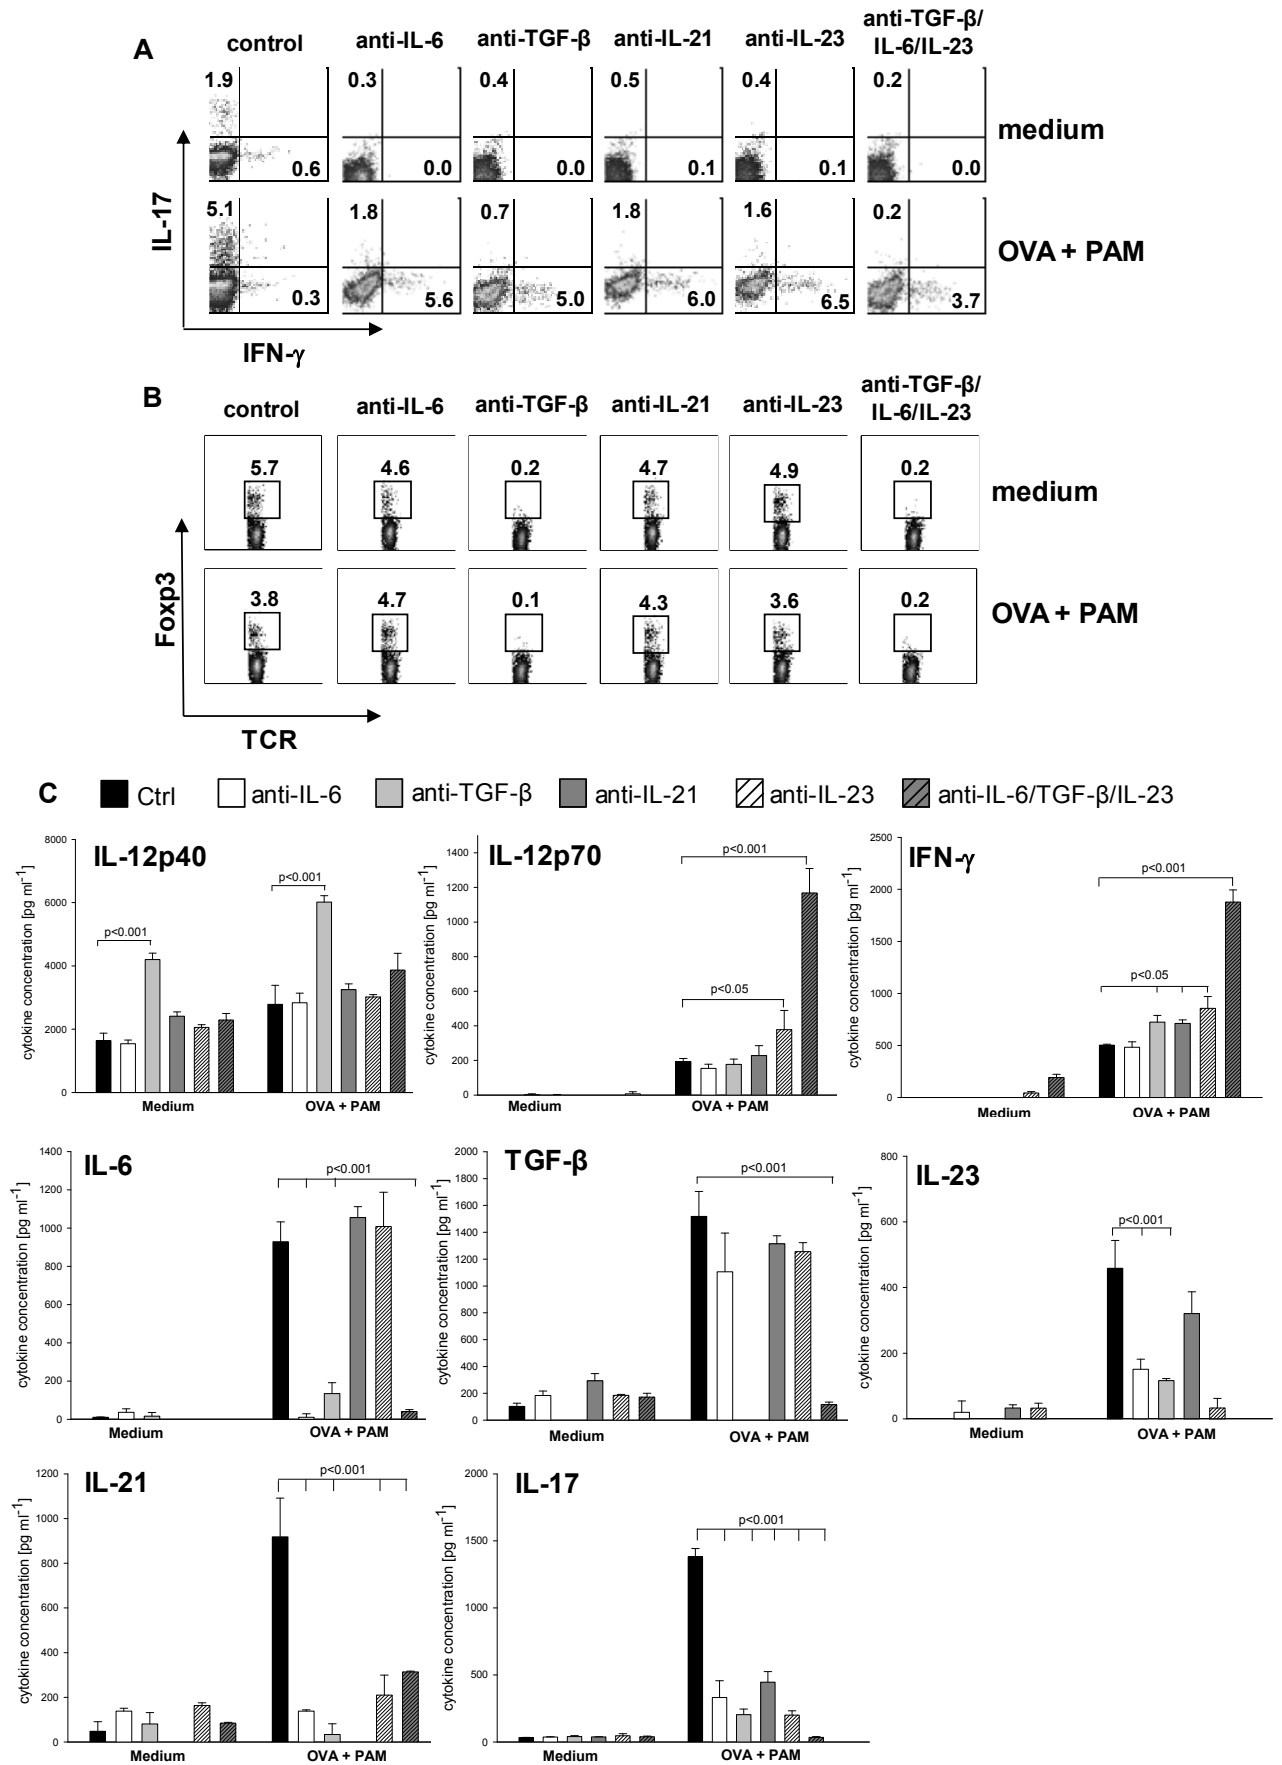

Supporting Information Fig.3 Weaver et al.

**A**

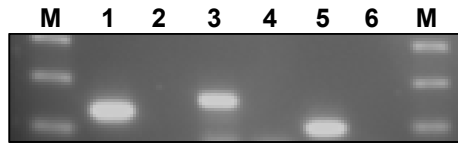

**B**

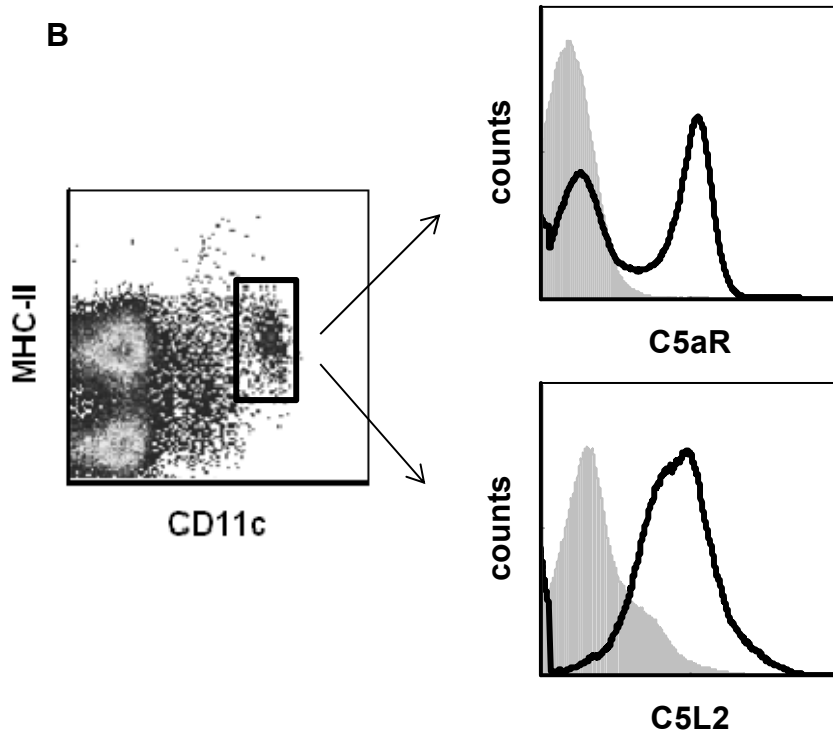

**C**

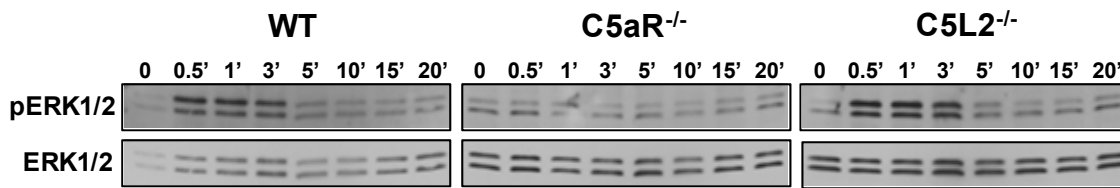

Supporting Information Fig.4. Weaver et al.

**A**

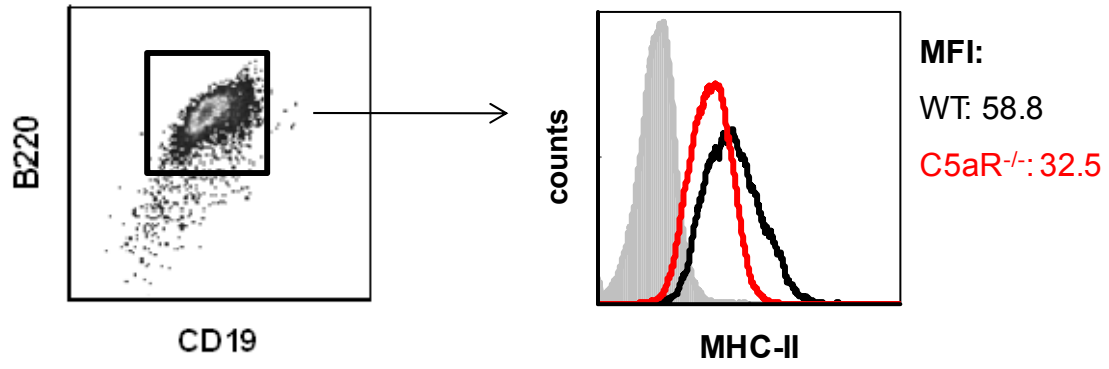

**B**

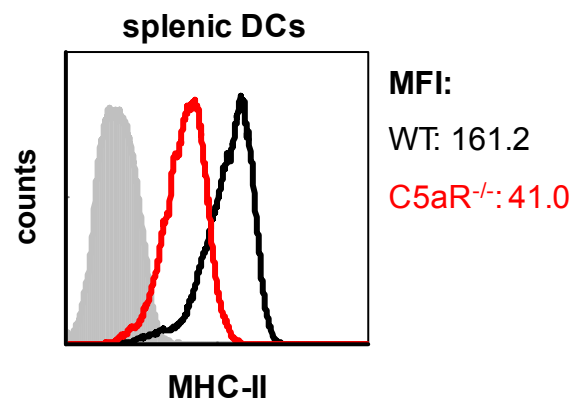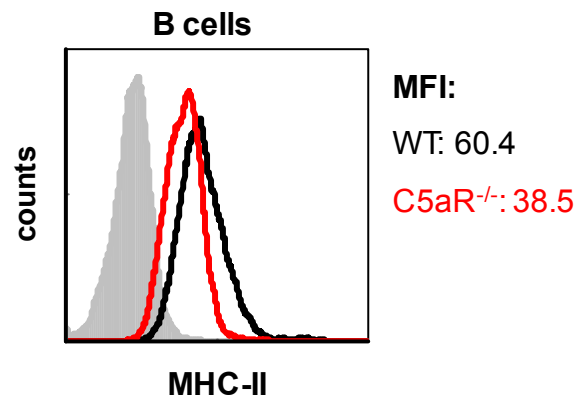

Supporting Information Fig. 5 Weaver et al.

## Supporting Information- Figure Legends

**Figure 1. C5aR<sup>-/-</sup> sDCs have an impaired ability to promote CD4<sup>+</sup> T cell proliferation.** sDCs from WT, C5aR<sup>-/-</sup>, and C5L2<sup>-/-</sup> mice were co-cultured with naïve CD4<sup>+</sup> T cells from OVA-TCR transgenic DO11.10/RAG2<sup>-/-</sup> mice for 4 days in the absence or the presence of PAM. OVA was added to the cell cultures at the indicated concentrations. CD4<sup>+</sup> T cells were labeled with 2  $\mu$ M carboxyfluorescein diacetate succinimidyl ester (CFSE) and the number of CFSE<sup>+</sup> CD4<sup>+</sup> T cells was analyzed by flow cytometry.

**Figure 2. C5aR signaling in sDCs promotes Th17 differentiation even under Th1 conditions.** (A) sDCs from WT, C5aR<sup>-/-</sup>, and C5L2<sup>-/-</sup> mice were co-cultured with naïve CD4<sup>+</sup> T cells from OVA-TCR transgenic DO11.10/RAG2<sup>-/-</sup> mice for 4 days and challenged with OVA (1  $\mu$ M) in the absence or presence of PAM. rIL-12 (10 ng) and anti-IL-4 (10  $\mu$ g/ml) were added to induce Th1 differentiation. The frequencies of IL-17A<sup>+</sup> and IFN- $\gamma$ <sup>+</sup> CD4<sup>+</sup> or (B) Foxp3<sup>+</sup> CD4<sup>+</sup> T cells were determined by intracellular staining using flow cytometry. C5aR antagonist was added to some cultures as indicated. Data are representative of 3 independent experiments. (C) Concentrations of IFN- $\gamma$ , IL-17A, IL-6, TGF- $\beta$ , IL-23 and IL-21 in culture supernatants from (A) as determined by ELISA. Data are mean  $\pm$  s.d. (n=3).

**Figure 3. TGF- $\beta$  is critical for C5aR-dependent Th17 differentiation** sDCs from C5aR<sup>-/-</sup> mice were co-cultured with naïve CD4<sup>+</sup> T cells from OVA-TCR transgenic DO11.10/RAG2<sup>-/-</sup> mice for 4 days in the absence or presence of PAM. Neutralizing antibodies to IL-6, TGF- $\beta$ , IL-21, IL-23, or the combination of anti-IL-6, anti-TGF- $\beta$  and anti-IL-23 (all at 10 $\mu$ g/ml) were added to the co-cultures. The frequencies of (A) IL-17A<sup>+</sup> and IFN- $\gamma$ <sup>+</sup> CD4<sup>+</sup> T cells were determined by intracellular staining using flow cytometry. The control is representative of the isotype controls used for each experiment. (B) As in (A), except that Foxp3<sup>+</sup> CD4<sup>+</sup> T cells were determined by intracellular staining using flow cytometry. (C) Concentrations of IL-12, IFN- $\gamma$ , IL-6, TGF- $\beta$ , IL-23, IL-21 and IL-17A in culture supernatants from (A) were determined by ELISA. Data are mean  $\pm$  s.d. (n=3).



**Figure 4. Cellular expression and functional properties of C5aR and C5L2 on sDCs.** (A) Total RNA from CD11c<sup>+</sup> sorted sDCs was extracted, and mRNA levels of C5aR (lane 1), C5L2 (lane 3), and 18s rRNA (lane 5) were determined by RT-PCR. Lanes 2, 4 and 6 depict control samples without cDNA. M- corresponds to the molecular weight marker. (B) Surface expression of C5aR and C5L2 on MHC-II<sup>+</sup>/CD11c<sup>high</sup> sDCs as determined by flow cytometry. Gray filled histograms depict isotype control. (C) sDCs from WT, C5aR<sup>-/-</sup>, and C5L2<sup>-/-</sup> mice were incubated for the indicated times with C5a. Cell lysates were run on SDS-PAGE, and phosphorylated ERK1/2 was detected by Western blotting. Loading controls were assessed with antibodies to ERK1/2.

**Figure 5. Low MHC-II expression levels in C5aR-deficient antigen presenting cells.** (A) Surface expression of MHC-II on B220<sup>+</sup>/CD19<sup>+</sup> splenic B cells from WT and C5aR<sup>-/-</sup> mice on the BALB/c background as determined by flow cytometry. (B) Surface expression of MHC-II on CD11c<sup>high</sup> sDCs and B220<sup>+</sup>/CD19<sup>+</sup> splenic B cells from WT and C5aR<sup>-/-</sup> mice on the C57BL/6 background as determined by flow cytometry. Gray filled histograms depict isotype controls. MFI: median fluorescence intensity.

**Supporting Information Table 1. C5aR<sup>-/-</sup> sDCs have an impaired ability to promote CD4<sup>+</sup> T cell proliferation.**

| <b>Proliferating DO11.10 CD4<sup>+</sup> T Cells (%)</b> |             |            |           |
|----------------------------------------------------------|-------------|------------|-----------|
| <b>OVA (μM)</b>                                          | <b>0.01</b> | <b>1.0</b> | <b>10</b> |
| <b>WT</b>                                                | 4           | 32         | 85        |
| <b>C5aR<sup>-/-</sup></b>                                | 4           | 10         | 59        |
| <b>C5L2<sup>-/-</sup></b>                                | 4           | 27         | 87        |
| <b>OVA (μM) + PAM<sub>3</sub>CSK<sub>4</sub></b>         | <b>0.01</b> | <b>1.0</b> | <b>10</b> |
| <b>WT</b>                                                | 4           | 81         | 92        |
| <b>C5aR<sup>-/-</sup></b>                                | 3           | 50         | 79        |
| <b>C5L2<sup>-/-</sup></b>                                | 4           | 81         | 90        |

Spleen derived CD11c<sup>+</sup> sorted sDCs from WT, C5aR<sup>-/-</sup>, and C5L2<sup>-/-</sup> mice were co-cultured with naïve CD4<sup>+</sup> T cells from OVA-TCR transgenic DO11.10/RAG2<sup>-/-</sup> mice in the absence or presence of PAM<sub>3</sub>CSK<sub>4</sub> (100ng/ml). Ovalbumin was added to the cell cultures at increasing concentrations. CD4<sup>+</sup> T cells were labeled with 2 μM carboxyfluorescein diacetate succinimidyl ester (CFSE) and the numbers of CFSE<sup>+</sup> CD4<sup>+</sup> T cells were analyzed by flow cytometry after 4 days of co-culture.
